# Supplementary material for: Oxygen vacancy engineering of ultra-small CuWO4 nanoparticles for boosting photocatalytic organic pollutant degradation
Source: Royal Society of Chemistry journal article supplement (doi:10.1039/d4dt00628c), 2024-01-01
Supplement: d4dt00628c1.pdf [file d4dt00628c1.pdf]

## Supporting information for

# Oxygen vacancies engineering ultra-small $\text{CuWO}_4$ nanoparticles for boosting photocatalytic organic pollutant degradation

Dingzhou Xiang, Xin Jin, Guilin Sun, Chenghuan Zhong, Shan Gao\*

School of Chemistry and Chemical Engineering, Faculty of materials science and engineering, Anhui Province Key Laboratory of Chemistry for Inorganic/Organic Hybrid Functionalized Materials, Key Laboratory of Structure and Functional Regulation of Hybrid Materials of Ministry of Education, Anhui University, 230601 Hefei, Anhui, P.R. China

\*Corresponding author: [shangao@ahu.edu.cn](mailto:shangao@ahu.edu.cn).

### 1. Experimental section

#### 1.1 Materials

Sodium tungstate dihydrate ( $\text{Na}_2\text{WO}_4 \cdot 2\text{H}_2\text{O}$ , AR, 99.5%), methylene blue (MB) and 5,5-Dimethyl-1-pyrroline N-oxide (DMPO) were purchased from Shanghai Macklin Biochemical Co., Ltd. Sodium oleate (CP) was purchased from Shanghai Aladdin Biochemical Technology Co., Ltd. Copper chloride dihydrate ( $\text{CuCl}_2 \cdot 2\text{H}_2\text{O}$ , AR), ammonia solution ( $\text{NH}_3 \cdot \text{H}_2\text{O}$ , AR), hydrochloric acid (HCl, AR) and ethanol absolute ( $\text{C}_2\text{H}_6\text{O}$ , AR) were purchased from Shanghai Sinopharm Chemical Reagent Co. Ltd. All the reagents used as received without further purification.

#### 1.2 Catalyst Preparation

**Synthesis of  $\text{CuWO}_4$ -Air:** Typically, 20 mg CP was dispersed into 30 mL ultrapure water under vigorous stirring for 0.5 h. Whereafter 1.5 mmol  $\text{CuCl}_2 \cdot 2\text{H}_2\text{O}$  was added and kept stirring for 0.5h, and then 1.5 mmol  $\text{Na}_2\text{WO}_4 \cdot 2\text{H}_2\text{O}$  was added to the above solution. After stirring for 0.5 h, 0.25 mL  $\text{NH}_3 \cdot \text{H}_2\text{O}$  was dropwise added, the pH of the solution was adjusted to 8~9 by dropping appropriate HCl aqueous solution (1 M) to form a homogenous suspension, then the mixture was

transferred to the 50 mL of Teflon-lined autoclave and heated at 180 °C for 12 h. After cooling to room temperature, the green precipitate was collected by centrifuging and washed with cyclohexane and ethanol several times and then dried in a vacuum-freezing drier for 12 h. The final product was directly calcined at 500 °C in the air for 1 h and then naturally cooled to ambient temperature, denoted as CuWO<sub>4</sub>-Air.

**Synthesis of CuWO<sub>4</sub>-OVs 350:** In detail, a small quantity of CuWO<sub>4</sub>-Air was ground into powder and then evenly spread at the bottom of an alumina combustion boat. The boat containing catalysts was thermally treated in a stream of H<sub>2</sub>/Ar (v/v = 5%/95%) mixed gas atmosphere at temperatures of 350 °C for 15 min to obtain CuWO<sub>4</sub> with abundant oxygen vacancies, labeled as CuWO<sub>4</sub>-OVs 350.

### 1.3 Characterizations

The crystal structures of the samples were analyzed by using an X-ray powder diffractometer (XRD, SmatrLab9kW, Japan) equipped with Cu K $\alpha$  radiation ( $\lambda = 0.15418$  nm). Transmission electron microscopy (TEM) and high-resolution TEM (HRTEM) images were obtained on a JEM-2100 transmission electron microscope (JEOL). X-ray photoelectron spectra (XPS) was measured using the ESCALAB 250Xi spectrometer with an Al anode (Al K $\alpha = 1846.6$  eV). The Raman spectroscopy was performed by a Thermo Scientific Xplora Plus confocal spectrometer with an Olympus BX43 microscope. Fourier transform-infrared (FT-TR) spectroscopy was recorded on a Nicolet iS50 Fourier-transform infrared spectrometer (Thermo Scientific, Warsaw, Poland) using KBr pellet support. The specific surface area was obtained by the Brunauer-Emmett-Teller (BET) method and measured by using a Micromeritics ASAP 2020 at 77 K with N<sub>2</sub> physical adsorption. Electron paramagnetic resonance (EPR) spectroscopy was carried out on a Bruker A300 EPR spectrometer at room temperature. UV-visible spectra were measured using a U-4100 photodiode array spectrophotometer. The photoluminescence spectra were measured in an F-4500 FL Spectrophotometer with an exciting wavelength of 320 nm. Photoelectrochemical tests were performed on the CHI 760E electrochemical workstation.

### 1.4 Density-functional theory calculations

The QuantumWise Atomistix ToolKit (ATK) 2020 software [1] was used to perform the density-functional theory (DFT) calculations in this paper. Herein, the linear combination of atomic

orbitals (LCAO) basis set was chosen combined with the hybrid Hybrid-Scuseria-Ernzerhof (HSE06) exchange-correlation [2]. The pseudopotential was set as PseudoDojo which was precise enough [3]. The density mesh cut-off was set as 100 Hartree, and the tolerance was  $1 \times 10^{-5}$  eV for energy and  $0.02$  eV/Å for force. The initial k-point mesh was sampled by the Monkhorst-Pack method with a separation of  $0.04$  Å. Then, the separation of  $0.02$  Å was used for the partial density of states (PDOS) calculations.

### 1.5 Photocatalytic degradation experiments

To explore the photocatalytic activities of  $\text{CuWO}_4$  catalysts, all the photodegradation tests were conducted in a homemade quartz container. 20 mg photocatalyst was dispersed in 50 mL MB ( $10$  mg  $\text{L}^{-1}$ ) solution to form uniform suspension under ultrasonication. Then the mixed suspension was magnetically stirred for 30 min in the dark to reach an adsorption-desorption equilibrium. In the photodegradation process, the 300 W Xenon light with a 420 nm cut-off filter was used as the light source. 1.5 mL suspension was pipetted every 10 min, and centrifuged. Finally, the absorbance of the filtrate was detected using a UV-2450 spectrophotometer. The catalyst was collected and reused after a full photocatalytic test. The recycling experiments were carried out five times. The reaction system temperature was maintained stable through a recycled cooling water system.

### 1.6 Hydroxyl radical trapped experiment

The suspension was prepared according to the photocatalytic degradation experiment. Then 20  $\mu\text{L}$  scavenger agents (DMPO) was added into 4 mL suspension under ultrasonication. Afterwards, the mixed suspension was transfer to nuclear magnetic tube for electron spin resonance (ESR) measurement. The generated  $\bullet\text{OH}$  radical in photocatalytic process ( $\lambda > 420$  nm) was captured by DMPO and then the signal was detected on the electron spin resonance spectrometer (A300-10/12, Bruker).

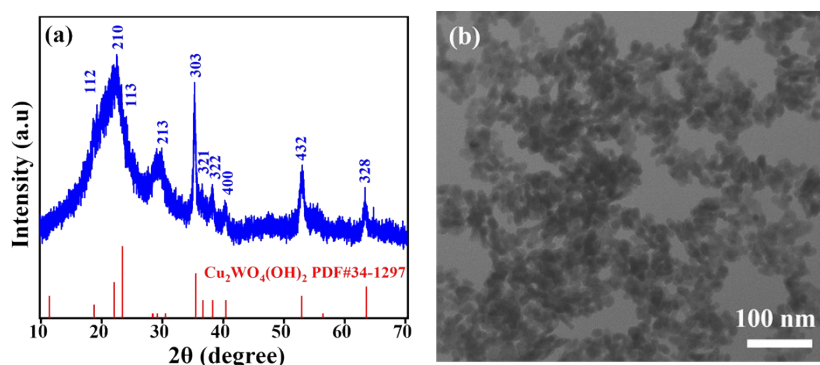

Fig. S1. (a) XRD pattern and (b) TEM image for  $\text{Cu}_2\text{WO}_4(\text{OH})_2$ .

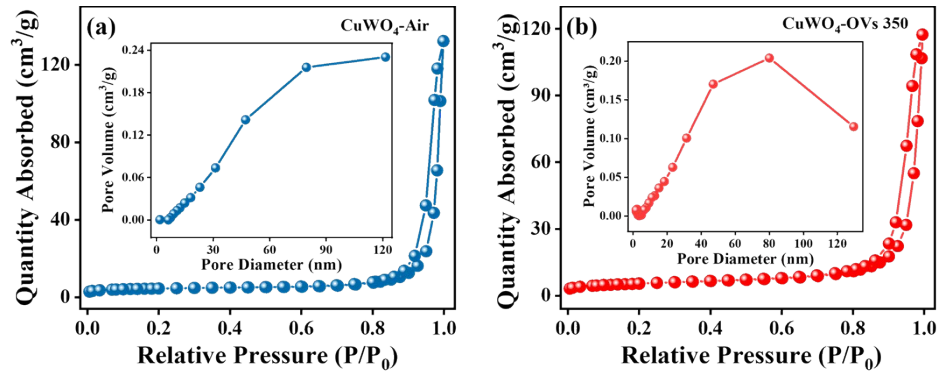

Fig. S2.  $N_2$ -isothermal adsorption and desorption curves of (a)  $CuWO_4$ -Air, (b)  $CuWO_4$ -OVs 350.

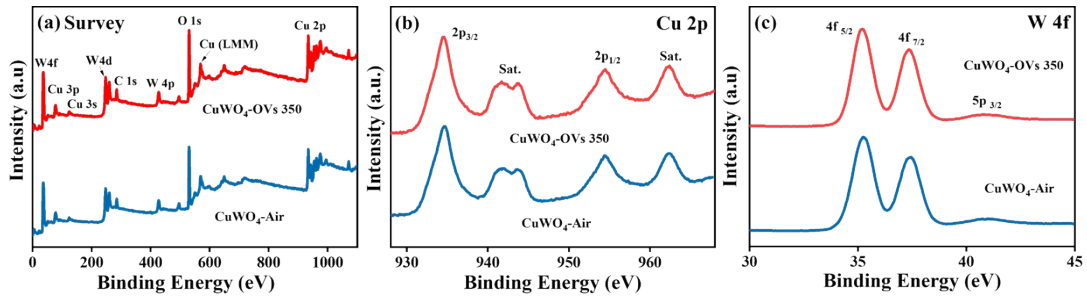

Fig. S3. XPS spectra of (a) Survey, (b) Cu 2p and (c) W 4f for  $CuWO_4$ -Air and  $CuWO_4$ -OVs 350.

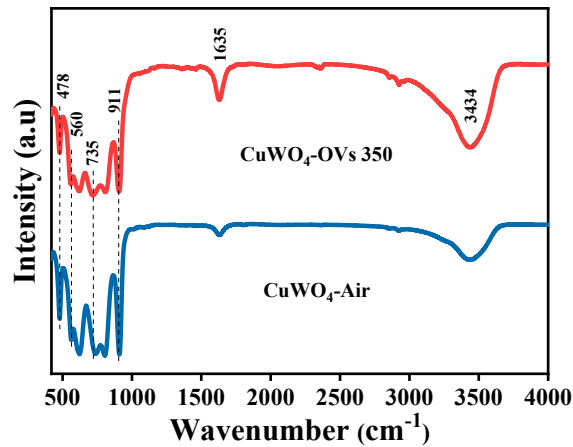

Fig. S4. FT-IR spectra of  $CuWO_4$ -Air and  $CuWO_4$ -OVs 350.

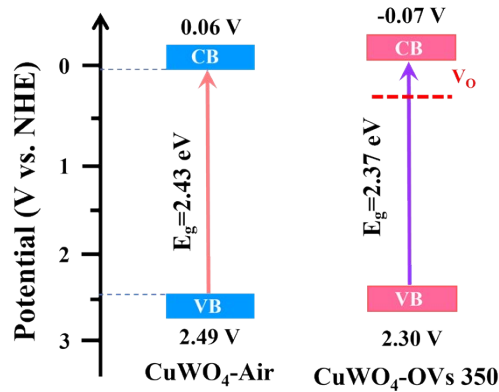

Fig. S5. Schematic illustration of the band structures for  $CuWO_4$ -Air and  $CuWO_4$ -OVs 350.

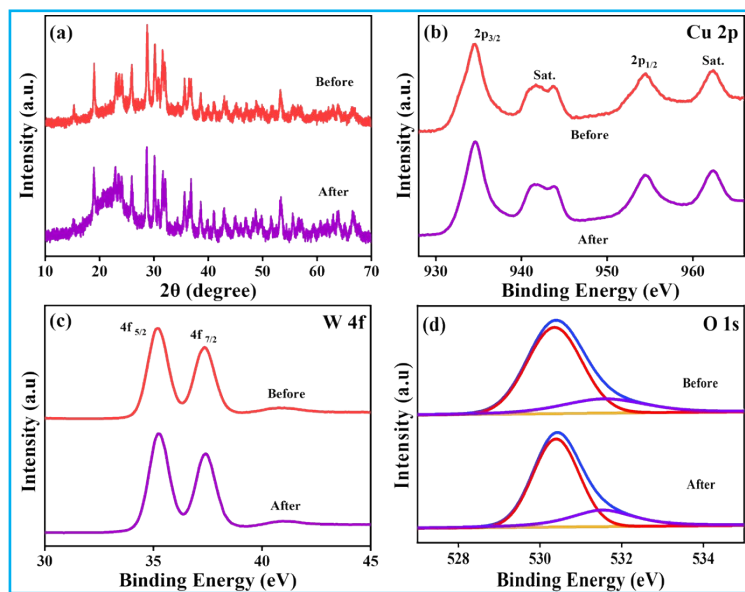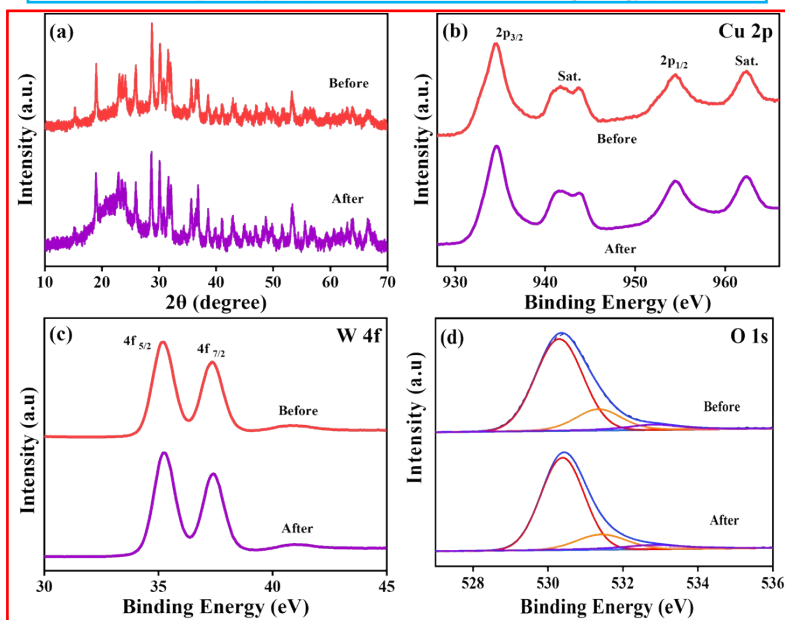

Fig. S6. (a) XRD pattern, (b) Cu 2p, (c) W 4f and (d) O 1s XPS spectra for the fresh and used CuWO<sub>4</sub>-OVs 350.

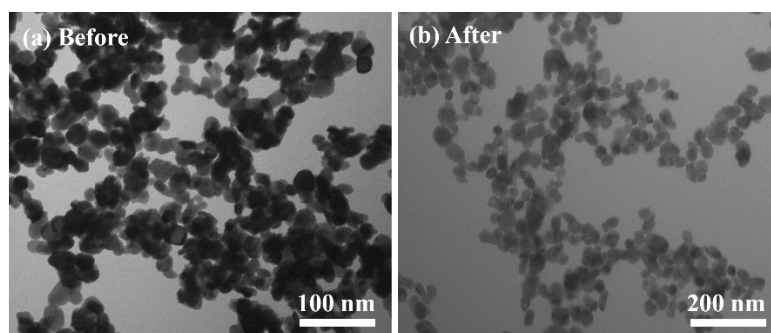

Fig. S7. (a-b) TEM images of the fresh and used CuWO<sub>4</sub>-OVs 350.

Table S1 BET Surface area ( $S_{\text{BET}}$ ), pore diameter ( $D_p$ ) and pore volume ( $V_p$ ) of CuWO<sub>4</sub>-Air and CuWO<sub>4</sub>-OVs 350

| Samples                    | $S_{\text{BET}}$ ( $\text{m}^2 \cdot \text{g}^{-1}$ ) <sup>a</sup> | Pore volume ( $\text{cm}^3 \cdot \text{g}^{-1}$ ) <sup>b</sup> | Average pore size (nm) <sup>b</sup> |
|----------------------------|--------------------------------------------------------------------|----------------------------------------------------------------|-------------------------------------|
| CuWO <sub>4</sub> -Air     | 19                                                                 | 0.16                                                           | 53                                  |
| CuWO <sub>4</sub> -OVs 350 | 18                                                                 | 0.17                                                           | 38                                  |

<sup>a</sup> Obtained from BET method.

<sup>b</sup> Total pore volume taken from the N<sub>2</sub> adsorption volume at a relative pressure (P/P<sub>0</sub>) of 0.99.

**Table S2** Lattice parameters of CuWO<sub>4</sub> and CuWO<sub>4</sub>-OVs unitcell.

|                        | <i>a</i> | <i>b</i> | <i>c</i> | $\alpha$ | $\beta$ | $\gamma$ |
|------------------------|----------|----------|----------|----------|---------|----------|
| CuWO <sub>4</sub>      | 9.52 Å   | 9.86 Å   | 6.02 Å   | 87.13°   | 81.44°  | 86.31°   |
| CuWO <sub>4</sub> -OVs | 9.63 Å   | 9.98 Å   | 6.02 Å   | 87.29°   | 81.64°  | 86.18°   |

**Table S3** Performance comparison of CuWO<sub>4</sub>-based photocatalysts for Methylene blue degradation.

| Photocatalyst                        | Relevant data                                                                                                                      | Light source                        | Pollutants | Removal ratio                                                          | Refs      |
|--------------------------------------|------------------------------------------------------------------------------------------------------------------------------------|-------------------------------------|------------|------------------------------------------------------------------------|-----------|
| CuWO <sub>4</sub> -OVs               | 20 mg of catalyst<br>50 mL MB aqueous solution (10 mg L <sup>-1</sup> )<br>S <sub>BET</sub> = 18 m <sup>2</sup> g <sup>-1</sup>    | 300 W Xe lamp<br>(λ ≥ 420 nm)       | MB         | 90.26 % in 70 min                                                      | This work |
| NiAl LDH/CuWO <sub>4</sub>           | 100 mg of catalyst<br>100 mL MB aqueous solution (10 mg L <sup>-1</sup> )                                                          | 400 W Xe lamp                       | MB         | 87.58% in 5 h                                                          | [4]       |
| CuWO <sub>4</sub> @Cu <sub>2</sub> O | Catalyst on Cu mesh (2×2 cm <sup>2</sup> )<br>50 mL organic pollutant aqueous solution (0.1 mM)                                    | 18 W LED lamp (415 nm ≤ λ ≤ 765 nm) | MB         | 90.2 % in 120 min                                                      | [5]       |
| CuWO <sub>4</sub> nanoparticle       | 30 mg of catalyst<br>20 mL MB aqueous solution (10 mg L <sup>-1</sup> )                                                            | 300 W Xe lamp (AM 1.5 G)            | MB         | 70 % in 180 min<br>99% in 30 min (1 mL H <sub>2</sub> O <sub>2</sub> ) | [6]       |
| Hollow CuWO <sub>4</sub>             | 40 mg of catalyst<br>50 mL MB aqueous solution (20 mg L <sup>-1</sup> )<br>S <sub>BET</sub> = 37.11 m <sup>2</sup> g <sup>-1</sup> | 350 W Xe lamp (λ > 420 nm)          | MB         | 95 % in 120 min                                                        | [7]       |

|                                           |                                                                                                                                           |                                  |    |                      |      |
|-------------------------------------------|-------------------------------------------------------------------------------------------------------------------------------------------|----------------------------------|----|----------------------|------|
| MOF/CuWO <sub>4</sub>                     | 10 mg of catalyst<br>50 mL MB aqueous<br>solution<br>100 mL in capacity<br>S <sub>BET</sub> = 801 m <sup>2</sup> g <sup>-1</sup>          | 5 W LED<br>lamp<br>(λ ≥ 420 nm)  | MB | 98 % in 135<br>min   | [8]  |
| CuWO <sub>4</sub> /ZnO                    | 30 mg of catalyst<br>150 mL MB<br>aqueous solution<br>(20 mg L <sup>-1</sup> )<br>S <sub>BET</sub> = 10.88 m <sup>2</sup> g <sup>-1</sup> | 300 W Xe<br>lamp<br>(AM 1.5 G)   | MB | 98.9 % in 120<br>min | [9]  |
| Ag-<br>CuWO <sub>4</sub> /WO <sub>3</sub> | 40 mg of catalyst<br>10 mg L <sup>-1</sup> MB<br>S <sub>BET</sub> = 56.2 m <sup>2</sup> g <sup>-1</sup>                                   | 200 W Xe<br>lamp<br>(λ ≥ 420 nm) | MB | 51% in 180<br>min    | [10] |

## References:

- [1] S. Smidstrup, T. Markussen, P. Vancraeyveld, J. Wellendorff, J. L. Schneider, T. Gunst, B. Verstichel, D. Stradi, P. A Khomyakov, U. G Vej-Hansen, M. E. Lee, S. T Chill, F. Rasmussen, G. Penazzi, F. Corsetti, A. Ojanperä, K. Jensen, M. L N Palsgaard, U. Martinez, A. Blom, M. Brandbyge and K. Stokbro, QuantumATK: An integrated platform of electronic and atomic-scale modelling tools, *J. Phys. Condens. Matter*, 2019, **32**, 015901.
- [2] J. Heyd, G. E. Scuseria and M. Ernzerhof, Hybrid functionals based on a screened Coulomb potential, *J. Chem. Phys.*, 2003, **118**, 8207-8215.
- [3] Y. Uemura, A. S. M. Ismail, S. H. Park, S. Kwon, M. Kim, Y. Niwa, H. Wadati, H. Elnaggar, F. Frati, T. Haarman, N. Höppel, N. Huse, Y. Hirata, Y. J. Zhang, K. Yamagami, S. Yamamoto, I. Matsuda, T. Katayama, T. Togashi, S. Owada, M. Yabashi, U. Halisdemir, G. Koster, T. Yokoyama, B. M. Weckhuysen and F. M. F. de Groot, Femtosecond Charge Density Modulations in Photoexcited CuWO<sub>4</sub>, *J. Phys. Chem. C*, 2021, **125**, 7329-7336.
- [4] S. Megala, A. Silambarasan, S. Kanagesan, M. Selvaraj, P. Maadeswaran, R. Ramesh and M. M. Alam, M. A. Assiri, Interfacial coupling of CuWO<sub>4</sub> nanoparticles on NiAl LDH as a novel

- photocatalyst for dissolved organic dye degradation, *J. Mol. Struct.*, 2022, **1252**, 132149.
- [5] C. L. Zhou, J. Cheng, K. Hou, Z. T. Zhu and Y. F. Zheng, Preparation of  $\text{CuWO}_4@\text{Cu}_2\text{O}$  film on copper mesh by anodization for oil/water separation and aqueous pollutant degradation, *Chem. Eng. J.*, 2017, **307**, 803-811.
- [6] M. Waimbo, G. Anduwan, O. Renagi, S. Badhula, K. Michael, J. P. S. Velusamy and Y. S. Kim, Improved charge separation through  $\text{H}_2\text{O}_2$  assisted copper tungstate for enhanced photocatalytic efficiency for the degradation of organic dyes under simulated sun light. *J. Photochem. Photobiol. B Biol.*, 2020, **204**, 111781.
- [7] J. F. Li, Y. B. Chen, Z. Wang and Z. Q. Liu, Self-templating synthesis of hollow copper tungstate spheres as adsorbents for dye removal, *J. Colloid Interface Sci.*, 2018, **526**, 459-469.
- [8] H. Ramezanalizadeh and F. Manteghi, Synthesis of a novel MOF/ $\text{CuWO}_4$  heterostructure for efficient photocatalytic degradation and removal of water pollutants. *J. Clean. Prod.*, 2018, **172**, 2655-2666.
- [9] C. Y. Chen, W. Y. Bi, Z. L. Xia, W. H. Yuan and L. Li. Hydrothermal synthesis of the  $\text{CuWO}_4/\text{ZnO}$  composites with enhanced photocatalytic performance, *ACS Omega*, 2020, **5**, 13185-13195.
- [10] R. Salimi, A. A. Sabbagh Alvani, N. Naseri, S. F. Du and D. Poelman, Visible-enhanced photocatalytic performance of  $\text{CuWO}_4/\text{WO}_3$  hetero-structures: Incorporation of plasmonic Ag nanostructures, *New J. Chem.*, 2018, **42**, 11109-11116.
